# Supplementary material for: Low yield and abiotic origin of N2O formed by the complete nitrifier Nitrospira inopinata
Source: PubMed Central journal article supplement (PMC6478695; doi:10.1038/s41467-019-09790-x), 2019-04-23
Supplement: 41467_2019_9790_MOESM1_ESM.pdf [file 41467_2019_9790_MOESM1_ESM.pdf]

**Low yield and abiotic origin of N<sub>2</sub>O formed by the complete nitrifier *Nitrospira inopinata***

Kits et al.

**Supplementary Information**

Supplementary Figure 1: **Effect of NH<sub>4</sub><sup>+</sup> concentration on NO production by *N. inopinata*.**

Supplementary Figure 2: **Instantaneous O<sub>2</sub> consumption and NO production during NH<sub>3</sub> oxidation by *N. europaea* ATCC 19718.**

Supplementary Figure 3: **Protein abundance levels of *Nitrospira inopinata* during growth on ammonia.**

Supplementary Figure 4: **Instantaneous O<sub>2</sub> consumption and NO production during NO<sub>2</sub><sup>-</sup> oxidation by *N. moscoviensis*.**

Supplementary Figure 5: **Effect of the NO scavenger PTIO on *N. inopinata* and *N. moscoviensis*.**

Supplementary Figure 6: **Instantaneous O<sub>2</sub> consumption and NO production during NH<sub>3</sub> oxidation by *N. inopinata*.**

Supplementary Figure 7: **Influence of O<sub>2</sub> limitation on N<sub>2</sub>O production by *N. moscoviensis*.**

Supplementary Figure 8: **Instantaneous O<sub>2</sub> consumption and NO production during NO<sub>2</sub><sup>-</sup> oxidation by *N. inopinata*.**

Supplementary Figure 9: **Instantaneous O<sub>2</sub> consumption and N<sub>2</sub>O production during NH<sub>3</sub> oxidation by *N. inopinata*.**

Supplementary Note 1: **Gene inventory for NO<sub>x</sub> metabolism of nitrifiers**

Supplementary References

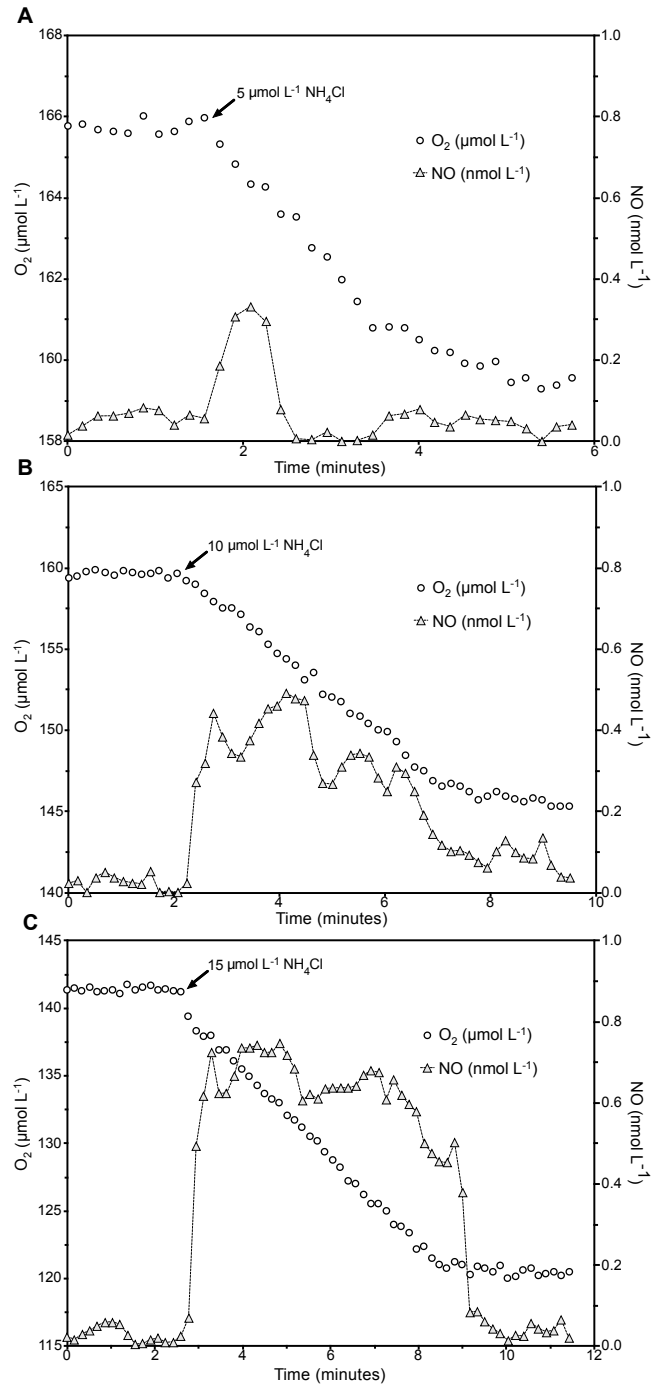

**Supplementary Figure 1. Effect of  $\text{NH}_4^+$  concentration on NO production by *N. inopinata*.**

Dissolved  $\text{O}_2$  is shown in open circles and dissolved NO in filled grey triangles. Experiments were performed in a 10 mL MR chamber fitted with an  $\text{O}_2$  and NO microsensor. The arrow marks the addition of 5  $\mu\text{M}$  (Panel A), 10  $\mu\text{M}$  (Panel B), or 15  $\mu\text{M}$  (Panel C) mM  $\text{NH}_4\text{Cl}$  into the

MR chamber; the same sample was measured repeatedly. No NO formation from  $\text{NH}_4^+$  was measurable in oxic sterile media controls containing heat-killed biomass. Source data are provided as a Source Data file.

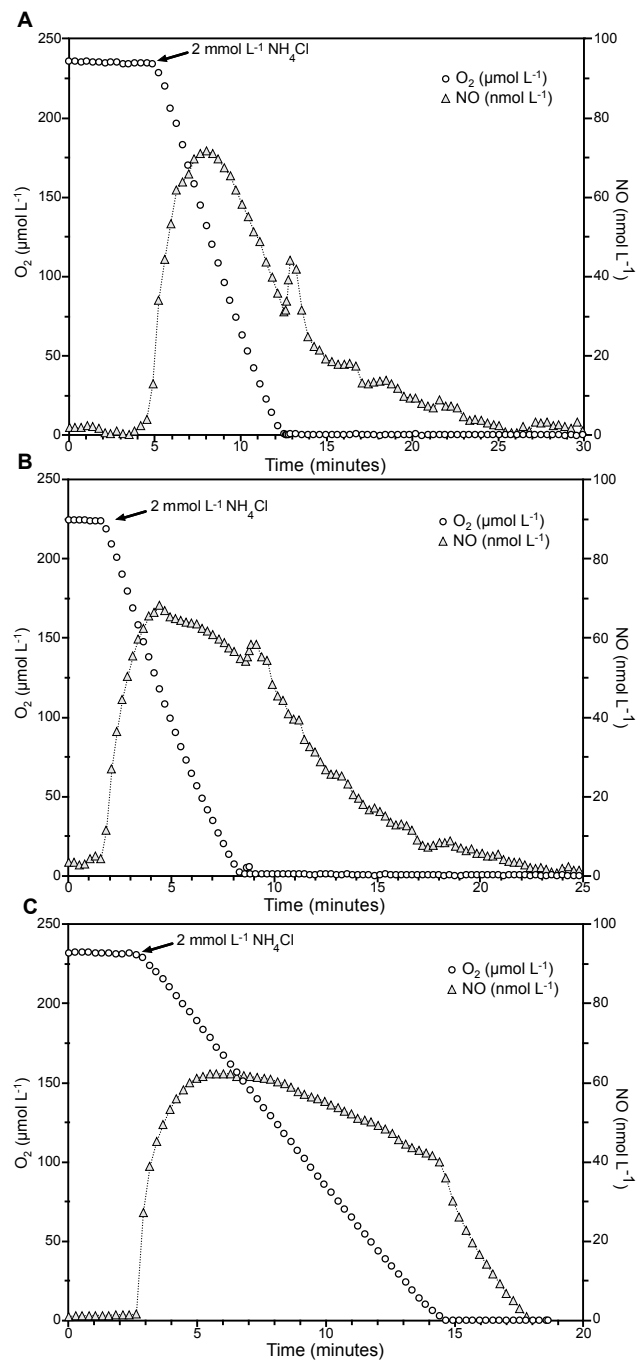

**Supplementary Figure 2. Instantaneous O<sub>2</sub> consumption and NO production during NH<sub>3</sub> oxidation by *N. europaea* ATCC 19718.** Dissolved O<sub>2</sub> is shown in open circles and dissolved NO in filled grey triangles. Experiments were performed in a 10 mL microrespiration (MR)

chamber fitted with an O<sub>2</sub> and NO microsensor. The arrow marks the addition of 2 mM NH<sub>4</sub>Cl into the MR chamber. A total of  $3 \times 10^9$  cells were used for each of the biological replicates (n = 3), which corresponds to ~3 times less biomass per experiment than used for comparable experiments with *N. inopinata* in Fig. 3 and Supplementary Figure 6. Panels A, B, and C correspond to the three biological replicates (n = 3). No NO formation from NH<sub>4</sub><sup>+</sup> was measurable in oxic sterile media controls containing heat-killed biomass. Source data are provided as a Source Data file.

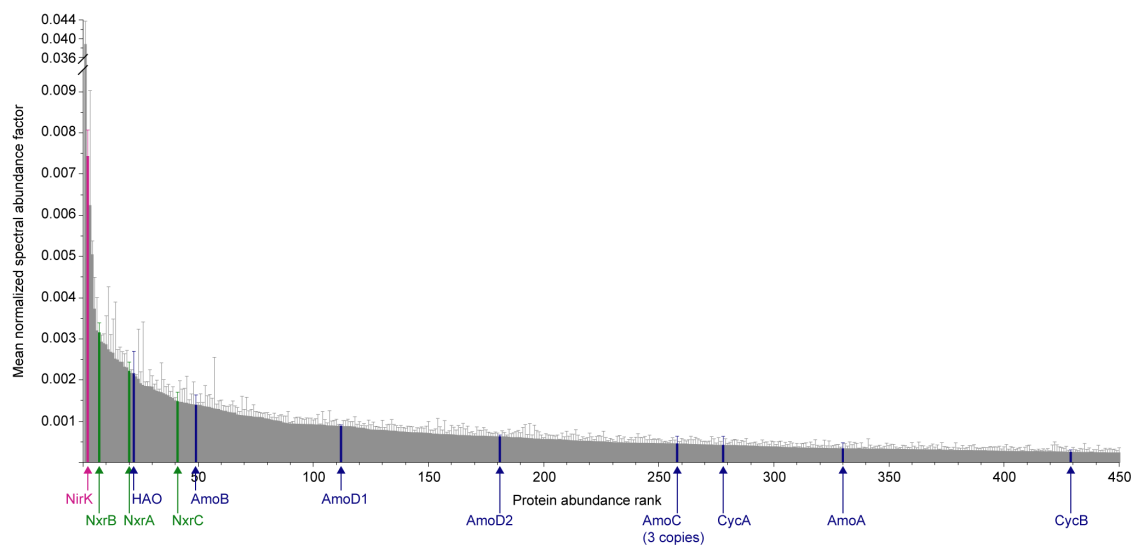

**Supplementary Figure 3. Protein abundance levels of *Nitrospira inopinata* during growth on ammonia.** Displayed are the 450 most abundant proteins from *N. inopinata*, after incubation with 1 mM ammonium for 48 h under aerobic conditions, in the metaproteome from a completely nitrifying enrichment culture that contained *N. inopinata* as the only ammonia and nitrite oxidizer<sup>13</sup>. Blue arrows and labels indicate key proteins for ammonia oxidation, green arrows and labels indicate key proteins for nitrite oxidation, and magenta highlights copper-containing nitrite reductase (NirK). Columns show the mean normalized spectral abundance factor (NSAF), error bars show 1 s.d. of  $n=4$  biological replicates. In total 1,083 proteins in the metaproteome were unambiguously assigned to *N. inopinata*. Only one of four putative NXR gamma subunits (NxrC) was among the top 450 expressed proteins. The other three NxrC candidates ranked at positions 561, 605, and 931. The AmoE1 protein was ranked at position 520, and HaoB at position 653. Abbreviations: Amo, ammonia monooxygenase (with subunits A to D); CycA, cytochrome  $c_{554}$ ; CycB, cytochrome  $c_{m552}$ ; HAO, hydroxylamine dehydrogenase; Nir, nitrite reductase; Nxr, nitrite oxidoreductase (with subunits A to C). Figure modified from reference<sup>13</sup>.

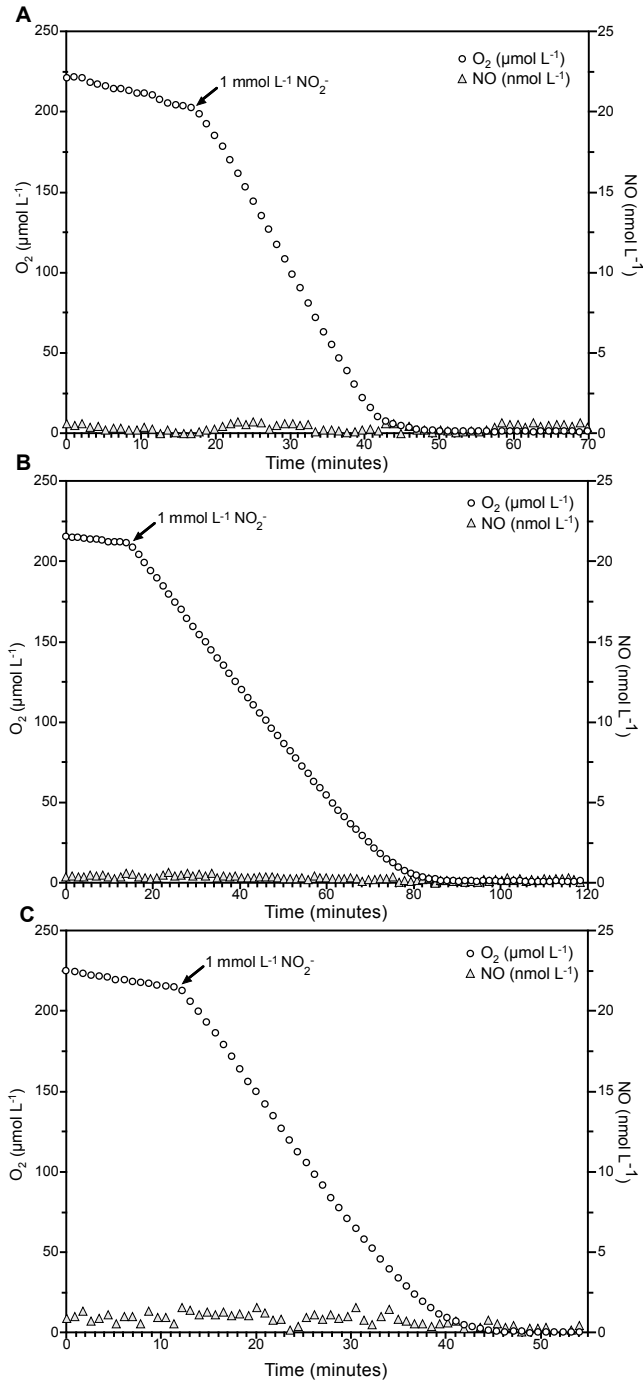

**Supplementary Figure 4. Instantaneous  $O_2$  consumption and  $NO$  production during  $NO_2^-$  oxidation by *N. moscoviensis*.** Dissolved  $O_2$  is shown in open circles and dissolved  $NO$  in filled grey triangles. Panels A, B, and C correspond to individual experiments from three ( $n = 3$ ) biological replicates. Experiments were performed in a 10 mL microrespiration (MR) chamber

fitted with an O<sub>2</sub> and NO microsensor. The arrow marks the addition of 1 mM NO<sub>2</sub><sup>-</sup> into the MR chamber. No NO formation from NO<sub>2</sub><sup>-</sup> was measurable in oxic sterile media controls containing heat-killed biomass. Source data are provided as a Source Data file.



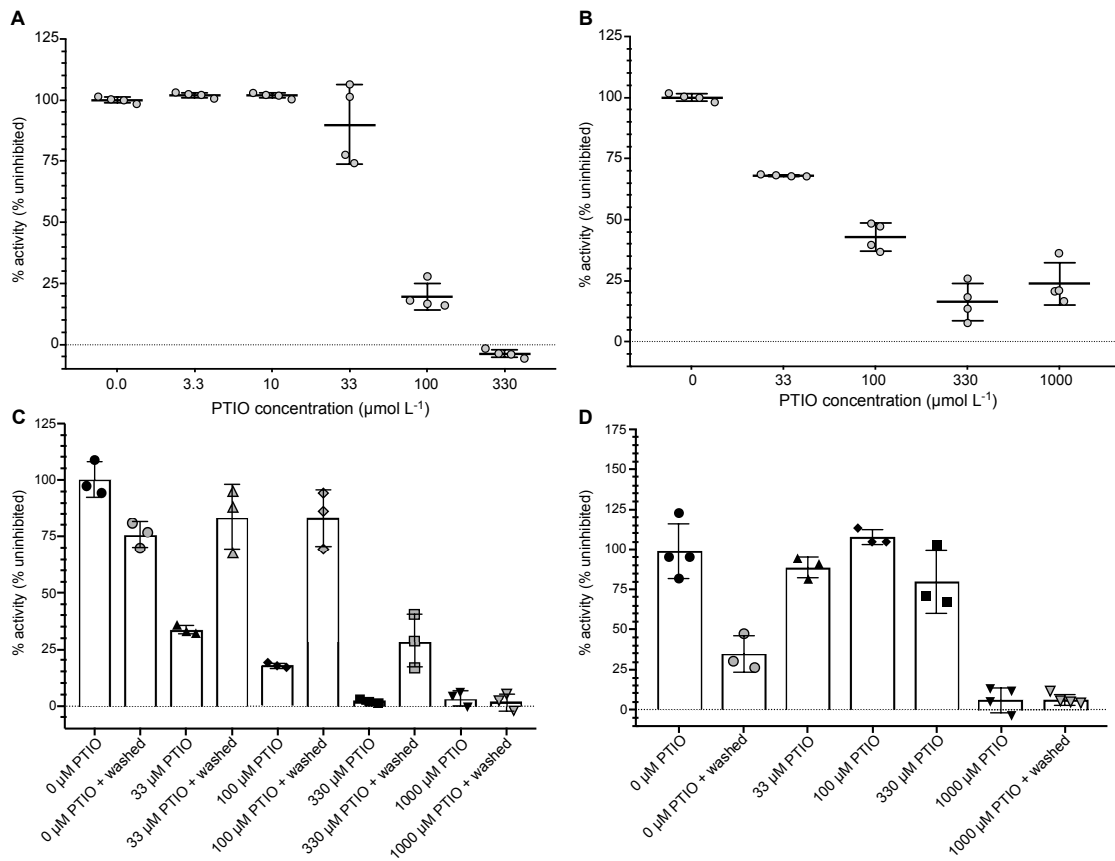

**Supplementary Figure 5. Effect of the NO scavenger PTIO on *N. inopinata* and *N.***

***moscoviensis*.** Panels A and B indicate the influence of PTIO on batch culture substrate oxidation activity throughout growth in *N. inopinata* (Panel A) and *N. moscoviensis* (Panel B).

Panels C and D show the influence of PTIO on substrate-dependent instantaneous O<sub>2</sub> consumption (determined using micro-respirometry) in *N. inopinata* (Panel C) and *N. moscoviensis* (Panel D). For Panels C and D only, cultures which were highly (>50%) inhibited by PTIO were re-harvested and washed as described in the Material and Methods and % activity was remeasured; the activity (%) of all washed cells was normalized to the unwashed 0 μM PTIO control. For all panels, activity (%) shows the difference in rate of linear substrate oxidation (or O<sub>2</sub> consumption) between the non-inhibited control cultures and cultures that were exposed to various concentrations of PTIO; 100% activity signifies no measurable inhibition

while 0% activity indicates total inhibition of activity. No activity was measurable in abiotic and dead cell controls. Center lines indicate the mean and error bars show the standard deviation of the mean for 4 (Panels A and B) or 3 (Panels C and D) biological replicates. The electron donor was always 1 mM NH<sub>3</sub> for *N. inopinata* and 1 mM NO<sub>2</sub><sup>-</sup> for *N. moscoviensis*. Source data are provided as a Source Data file.

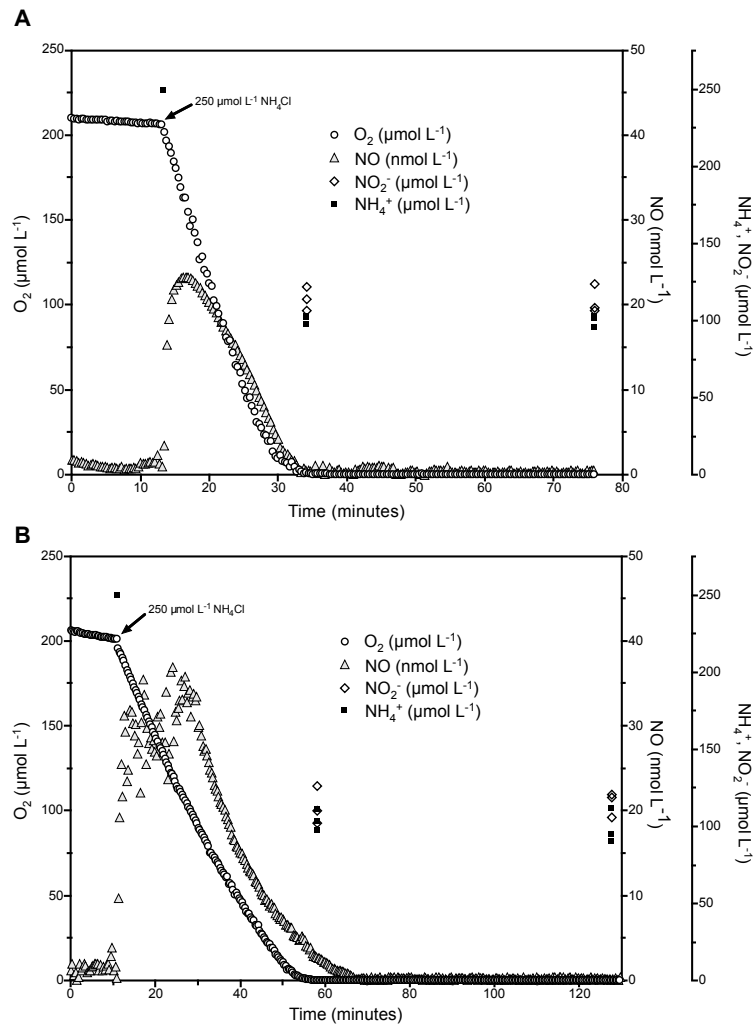

**Supplementary Figure 6. Instantaneous  $O_2$  consumption and NO production during  $NH_3$  oxidation by *N. inopinata*.** Dissolved  $O_2$  is shown in open circles, dissolved NO in filled grey triangles,  $NO_2^-$  in open diamonds, and  $NH_4^+$  in filled squares. The  $NH_4^+$  concentration immediately after injection for each replicate was inferred from the injected volume of a stock  $NH_4Cl$  solution, otherwise  $NO_2^-$  and  $NH_4^+$  concentrations were determined in 3 technical replicates ( $n = 3$ ) for each biological replicate. Panels A and B correspond to two biological replicates; a third biological replicate is shown in Fig. 3. Experiments were performed in a microrespiration (MR) chamber fitted with  $O_2$  and NO microsensors. The arrow marks the addition of  $250 \mu M NH_4Cl$  into the MR chamber. About  $110 \mu M$  residual  $NO_2^-$  was present in

the chamber once O<sub>2</sub> levels dropped below the limit of detection (300 nM). No NO formation from NH<sub>4</sub><sup>+</sup> was measurable in sterile media controls containing the same amount of heat-killed biomass of *N. inopinata*. Source data are provided as a Source Data file.

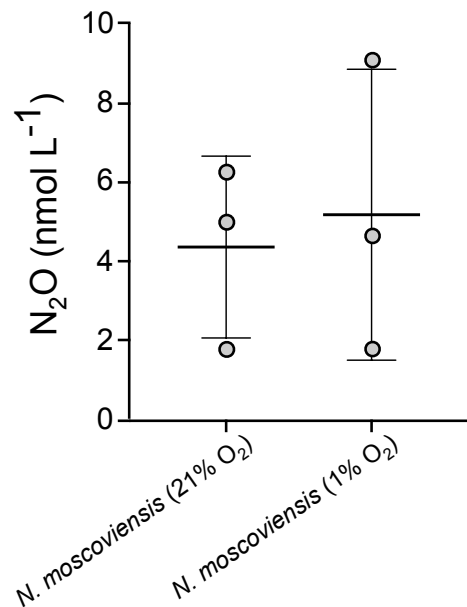

**Supplementary Figure 7. Influence of O<sub>2</sub> limitation on N<sub>2</sub>O production by *N. moscoviensis*.**

Accumulation of N<sub>2</sub>O in the headspace is shown in nmol L<sup>-1</sup> above atmospheric N<sub>2</sub>O. The black bar indicates N<sub>2</sub>O accumulation in cultures of *N. moscoviensis* incubated at atmospheric O<sub>2</sub> concentrations whereas the grey bar indicates N<sub>2</sub>O accumulation in cultures incubated at hypoxic (~1.0% at the start of the experiment) O<sub>2</sub> concentrations. The amount of biomass at t = 0 was the same in the oxic and hypoxic vials. The same amount of substrate was consumed in both treatments (1 mM NO<sub>2</sub><sup>-</sup>). Center lines indicate the mean and error bars show the standard deviation of the mean for three (n = 3) biological replicates. Source data are provided as a Source Data file.

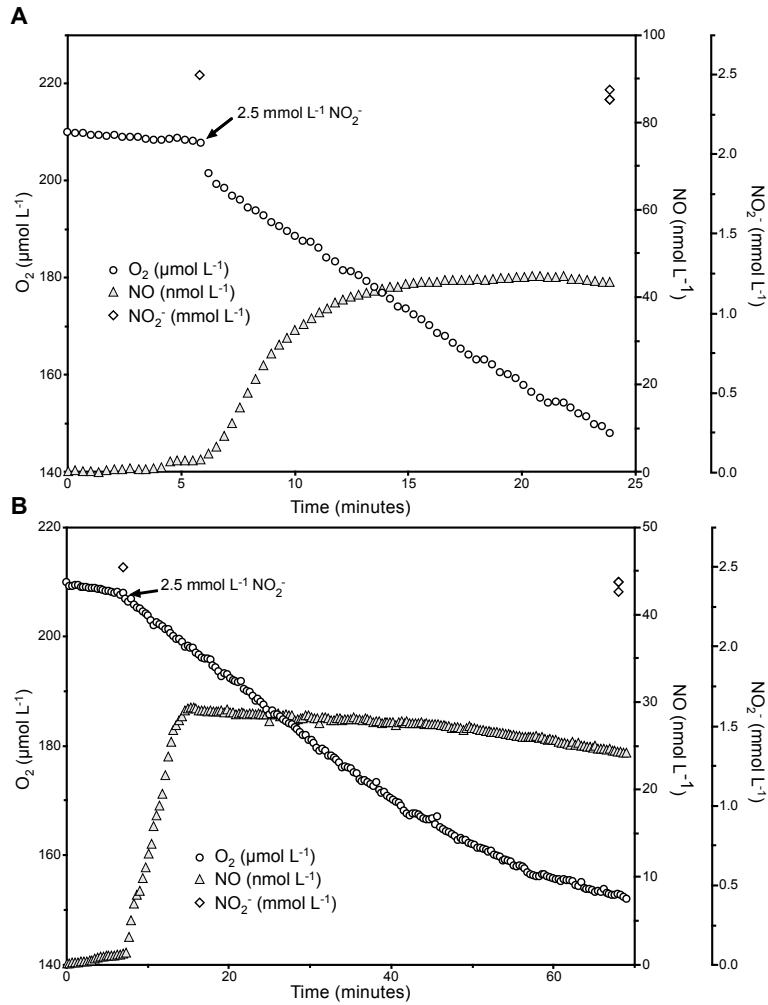

**Supplementary Figure 8. Instantaneous  $O_2$  consumption and NO production during  $NO_2^-$  oxidation by *N. inopinata*.** Dissolved  $O_2$  is shown in open circles, dissolved NO in filled grey triangles, and  $NO_2^-$  in open diamonds. The  $NO_2^-$  concentration immediately after injection for each replicate was inferred from the injected volume of a stock  $NaNO_2$  solution, otherwise  $NO_2^-$  concentrations were determined in 3 technical replicates ( $n = 3$ ) for each biological replicate. Panels A and B correspond to two biological replicates; a third biological replicate is shown in Fig. 4. Experiments were performed in a 10 mL microrespiration (MR) chamber fitted with an  $O_2$  and NO microsensors. The arrow marks the addition of 2.5 mM  $NO_2^-$  into the MR chamber.

No NO formation from  $\text{NO}_2^-$  was measurable in oxic sterile media controls containing heat-killed biomass. Source data are provided as a Source Data file.

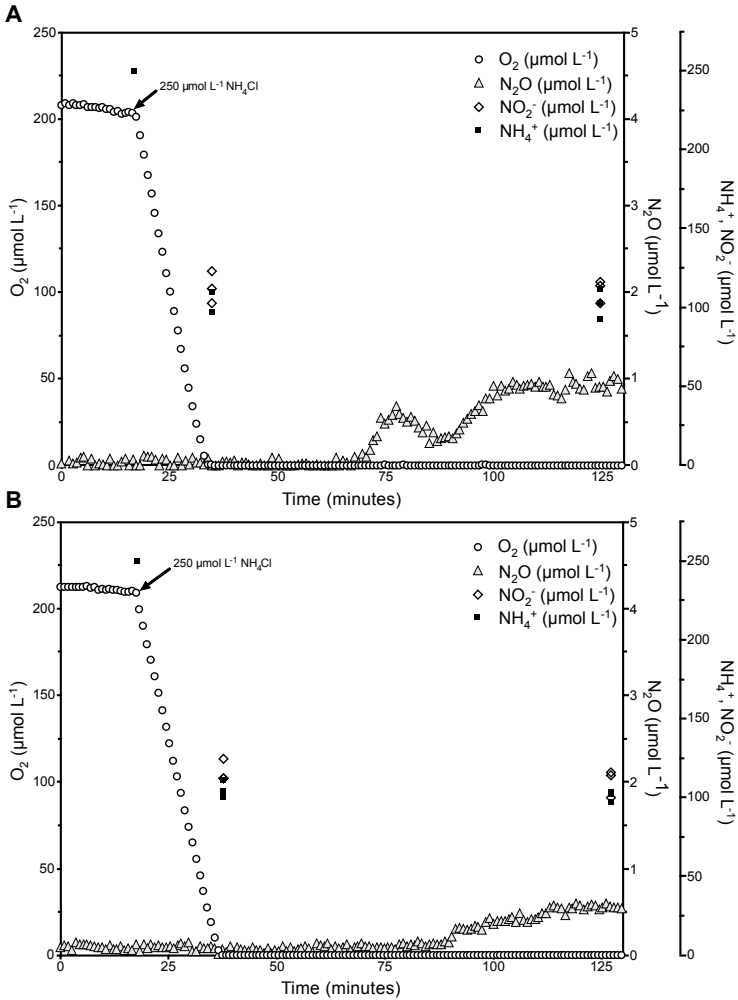

**Supplementary Figure 9. Instantaneous  $O_2$  consumption and  $N_2O$  production during  $NH_3$  oxidation by *N. inopinata*.** Panels A and B correspond to two biological replicates; a third biological replicate is shown in Fig. 5. Dissolved  $O_2$  is shown in open circles, dissolved  $N_2O$  in filled grey triangles,  $NO_2^-$  in open diamonds, and  $NH_4^+$  in filled squares. The  $NH_4^+$  concentration immediately after injection for each replicate was inferred from the injected volume of a stock  $NH_4Cl$  solution, otherwise  $NO_2^-$  and  $NH_4^+$  concentrations were determined in 3 technical replicates ( $n = 3$ ) for each biological replicate. Experiments were performed in a 10 mL microrespiration (MR) chamber fitted with  $O_2$  and  $N_2O$  microsensors. The arrow marks the



addition of 250  $\mu\text{M}$   $\text{NH}_4\text{Cl}$  into the MR chamber. About 110  $\mu\text{M}$  residual  $\text{NO}_2^-$  was present in the chamber once  $\text{O}_2$  reached below the detectable levels. Source data are provided as a Source Data file.

### **Supplementary Note 1:**

#### **Gene inventory for $\text{NO}_x$ metabolism of nitrifiers**

**Dissimilatory nitrite reductase NirK.** Of the two known non-homologous dissimilatory nitrite reductases (NirS and NirK), only the copper-containing dissimilatory nitrite reductase *nirK* is encoded in the genomes of nitrifiers. Our extended comparative genome analysis further supports previous observations that *nirK* genes are not found in all AOB genomes<sup>1-3</sup>. In this context it is interesting to note that in AOB *nirK* is not required for  $\text{NO}_2^-$  reduction to NO and this even holds true for AOB that do possess the gene<sup>4-6</sup>, strongly suggesting the existence of novel dissimilatory nitrite reductases in these organisms. In contrast to AOB, AOA lack a canonical HAO and the most current physiological models postulate that NO is an active and necessary co-substrate during the oxidation of  $\text{NH}_2\text{OH}$  to  $\text{NO}_2^-$  or that NO is the product of  $\text{NH}_2\text{OH}$  oxidation by either NirK or an anchored PEFG-CTERM domain-containing Cu metalloenzyme<sup>7,8</sup>. In these models, NO is either produced or oxidized by NirK that is encoded in the genome of most AOA and was found highly expressed in their transcriptomes and proteomes<sup>8-10</sup>. However, recent work on thermophilic, autotrophic, archaeal ammonia oxidizers shows that these microbes do not possess *nirK* and it has been speculated that they obtain NO from metabolic partner organisms<sup>11,12</sup>.

#### **Supplementary References:**

1. Kozłowski, J. A., Dimitri Kits, K. & Stein, L. Y. Comparison of nitrogen oxide metabolism

- among diverse ammonia-oxidizing bacteria. *Front. Microbiol.* **7**, (2016).
2. Kozłowski, J. A., Kits, K. D. & Stein, L. Y. Genome sequence of *Nitrosomonas communis* strain Nm2, a mesophilic ammonia-oxidizing bacterium isolated from mediterranean soil. *Genome Announc.* **4**, (2016).
  3. Hayatsu, M. et al. An acid-tolerant ammonia-oxidizing  $\gamma$ -proteobacterium from soil. *ISME J.* **11**, 1130–1141 (2017).
  4. Kozłowski, J. A., Price, J. & Stein, L. Y. Revision of N<sub>2</sub>O-producing pathways in the ammonia-oxidizing bacterium *Nitrosomonas europaea* ATCC 19718. *Appl. Environ. Microbiol.* **80**, 4930–4935 (2014).
  5. Kozłowski, J. A., Dimitri Kits, K. & Stein, L. Y. Comparison of nitrogen oxide metabolism among diverse ammonia-oxidizing bacteria. *Front. Microbiol.* **7**, (2016).
  6. Hayatsu, M. et al. An acid-tolerant ammonia-oxidizing  $\gamma$ -proteobacterium from soil. *ISME J.* **11**, 1130–1141 (2017).
  7. Kozłowski, J. A., Stieglmeier, M., Schleper, C., Klotz, M. G. & Stein, L. Y. Pathways and key intermediates required for obligate aerobic ammonia-dependent chemolithotrophy in bacteria and Thaumarchaeota. *ISME J.* **10**, 1836–1845 (2016).
  8. Carini, P., Dupont, C. L. & Santoro, A. E. Patterns of thaumarchaeal gene expression in culture and diverse marine environments. *Environ. Microbiol.* (2018).  
<https://doi.org/10.1111/1462-2920.14107>.
  9. Kerou, M. et al. Proteomics and comparative genomics of *Nitrososphaera viennensis* reveal the core genome and adaptations of archaeal ammonia oxidizers. *Proc. Natl. Acad. Sci. USA* **113**, E7937–E7946 (2016).
  10. Qin, W. et al. Stress response of a marine ammonia-oxidizing archaeon informs

- physiological status of environmental populations. *ISME J.* **12**, 508–519 (2018).
11. Daebeler, A. et al. Cultivation and genomic analysis of “*Candidatus Nitrosocaldus islandicus*”, an obligately thermophilic, ammonia-oxidizing Thaumarchaeon from a hot spring biofilm in Graendalur Valley, Iceland. *Front. Microbiol.* **9**, 193 (2018).
  12. Abby, S. S. et al. *Candidatus Nitrosocaldus cavascurensis*, an ammonia oxidizing, extremely thermophilic archaeon with a highly mobile genome. *Front. Microbiol.* **9**, 28 (2018).
  13. Daims, H. et al. Complete nitrification by *Nitrospira* bacteria. *Nature* **528**, 504–509 (2015).
